# Supplementary material
Source: PubMed Central journal article supplement (PMC6062267)
Supplement: TX-006-C7TX00107J-s001.pdf [file TX-006-C7TX00107J-s001.pdf]

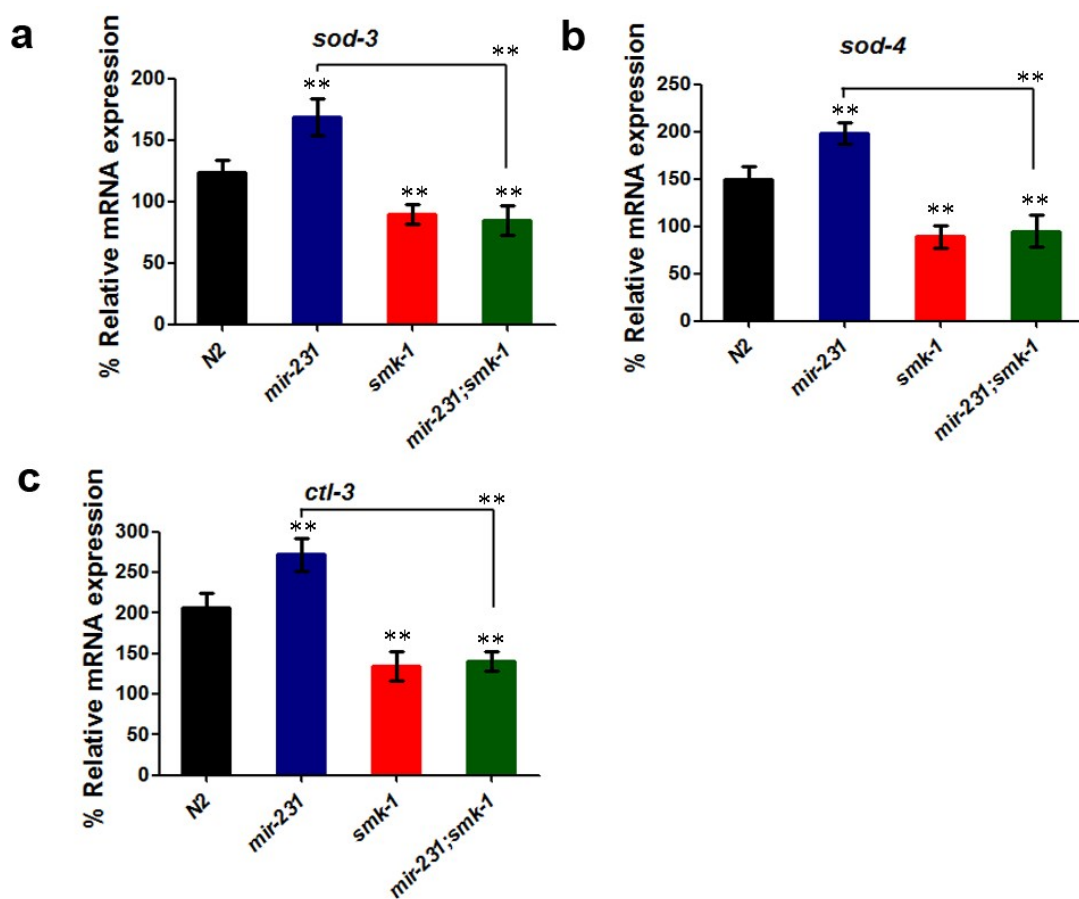

**Fig. S1.** Effects of exposure to coal combustion related PM<sub>2.5</sub> on transcriptional expressions of *sod-3*, *sod-4*, and *ctl-3*. Bars represent means ± SD. \*\**P* < 0.01 vs N2 (if not specially indicated).

**Table S1.** Primers for reverse transcription of miRNAs

| miRNA          | Primer                                                      |
|----------------|-------------------------------------------------------------|
| <i>mir-230</i> | GTCGTATCCAGTGCGTGTCGTGGAGTCGGCAATTGCACTGGATACG<br>ACTCTCCTG |
| <i>mir-231</i> | GTCGTATCCAGTGCGTGTCGTGGAGTCGGCAATTGCACTGGATACG<br>ACTTCTGCC |
| <i>mir-232</i> | GTCGTATCCAGTGCGTGTCGTGGAGTCGGCAATTGCACTGGATACG<br>ACTCACCGC |
| <i>mir-83</i>  | GTCGTATCCAGTGCGTGTCGTGGAGTCGGCAATTGCACTGGATACG<br>ACTTACTGA |
| <i>mir-62</i>  | GTCGTATCCAGTGCGTGTCGTGGAGTCGGCAATTGCACTGGATACG<br>ACCTGTAAG |
| <i>mir-251</i> | GTCGTATCCAGTGCGTGTCGTGGAGTCGGCAATTGCACTGGATACG<br>ACTAAGAGC |
| <i>mir-234</i> | GTCGTATCCAGTGCGTGTCGTGGAGTCGGCAATTGCACTGGATACG<br>ACAAGGGTA |
| <i>mir-35</i>  | GTCGTATCCAGTGCGTGTCGTGGAGTCGGCAATTGCACTGGATACG<br>ACACTGCTA |

**Table S2.** Primers for quantitative real-time PCR of miRNAs

| miRNA                | primer                         |
|----------------------|--------------------------------|
| <i>mir-230</i>       | CTACATGTATTAGTTGTGCGACCAGGAGA  |
| <i>mir-231</i>       | TTATACTAAGCTCGTGATCAACAGGCAGAA |
| <i>mir-232</i>       | ATACGTTAAATGCATCTTAACTGCGGTGA  |
| <i>mir-83</i>        | CCGCGCTAGCACCATATAAATTCAGTAA   |
| <i>mir-62</i>        | TGCATATGATATGTAATCTAGCTTACAG   |
| <i>mir-251</i>       | TATCTATTAAGTAGTGGTGCCGCTCTTA   |
| <i>mir-234</i>       | TATCCGTTATTGCTCGAGAATACCCTT    |
| <i>mir-35</i>        | TACGTATCACCGGGTGGAAACTAGCAGT   |
| Common reward primer | GTGCAGGGTCCGAGGT               |

**Table S3.** Primers used for quantitative real-time PCR of genes

| Gene         | Forward Primer           | Reverse Primer           |
|--------------|--------------------------|--------------------------|
| <i>tba-1</i> | TCAAACTGCCATCGCCGCC      | TCCAAGCGAGACCAGGCTTCAG   |
| <i>clk-1</i> | GCTTATGCTCTCGGTGTCGGTTCA | ATCGTCGGCAAGGAGTTCTTTCAA |
| <i>gas-1</i> | ACCCAAACCCGAAACTCCCACACA | TTCTCGTCGAAATCCGAAACCCGC |
| <i>isp-1</i> | CATTCCCCGATATGTCAAACATC  | TGTACAACCTCCTTTCCGGCCCAC |
| <i>sod-1</i> | GAATCTTCTCACTCAGGTCTCCAA | TTCTGTGTGATCCAGATAGTACCG |
| <i>sod-2</i> | ACTATGCTGATTTGGAGCCTGTAA | GTGAAGCTTTTCTCAATTTGGTT  |
| <i>sod-3</i> | ATCACTATTGCGGTTCAAGGCTCT | AATTCCAAAAAGTGGGACCATTCC |
| <i>sod-4</i> | GTTTCCGACTCTCTTGCCTCATTA | GCTTCCAGCATTTCAGTTGTTTT  |
| <i>ctl-1</i> | CTCCTACACGGACACGCAT      | GCATCTCCCTGGCTTTTCAT     |
| <i>ctl-2</i> | CGAACAGCTTCAACTATGG      | GTGGCTGGGAATGTGGTAT      |
| <i>ctl-3</i> | TTCTCCTACACGGACACGC      | GCATCTCCCTGGCTTTTCAT     |
| <i>mev-1</i> | GGAATTCGCTTCTTAGGAT      | GCAGTCTTGTTGCTCTTGT      |
| <i>smk-1</i> | AACGAGACGCAACCAACC       | CTCACCCAGCCTCCCAAT       |

**Table S4.** Primers used for RNAi construction

| Gene         | Forward Primer            | Reverse Primer            |
|--------------|---------------------------|---------------------------|
| <i>sod-3</i> | CTATCTAGATACTGCTCGCACTGC  | CTGCCATGGTTATTGTCGAGCATT  |
| <i>sod-4</i> | AGCTCTAGAGCACGTGCCTACATTT | TATCCATGGCGATAGTTCCACATGC |
|              |                           | A                         |
| <i>ctl-3</i> | GCGTCTAGACGGTCAACGACACAA  | TATCCATGGCTTGCCGACCTCGATC |
|              | A                         |                           |

**Table S5.** The dysregulated miRNAs in coal combustion related PM<sub>2.5</sub> exposed nematodes

| miRNA              | chromosome | start    | end      | strand | FC       | Regulation |
|--------------------|------------|----------|----------|--------|----------|------------|
| <i>mir-1020-5p</i> | III        | 10047794 | 10047815 | -      | 5.74628  | up         |
| <i>mir-124-3p</i>  | IV         | 11871798 | 11871818 | +      | 3.16375  | up         |
| <i>mir-229-5p</i>  | III        | 2172459  | 2172484  | +      | 3.10218  | up         |
| <i>mir-230-5p</i>  | X          | 5803908  | 5803930  | +      | -2.84277 | down       |
| <i>mir-231-3p</i>  | III        | 7545072  | 7545095  | -      | 3.28045  | up         |
| <i>mir-232-3p</i>  | IV         | 10994184 | 10994206 | -      | 3.00402  | up         |
| <i>mir-234-3p</i>  | II         | 14466278 | 14466298 | -      | -2.57702 | down       |
| <i>mir-251</i>     | X          | 11004746 | 11004767 | +      | 3.32446  | up         |
| <i>mir-35-3p</i>   | II         | 11537668 | 11537689 | +      | -3.71203 | down       |
| <i>mir-37-3p</i>   | II         | 11537893 | 11537914 | +      | -3.32492 | down       |
| <i>mir-38-3p</i>   | II         | 11537990 | 11538011 | +      | -3.14307 | down       |
| <i>mir-392-3p</i>  | X          | 13597298 | 13597319 | +      | 5.44682  | up         |
| <i>mir-40-3p</i>   | II         | 11538239 | 11538260 | +      | -4.21407 | down       |
| <i>mir-43-3p</i>   | II         | 11889970 | 11889992 | +      | 4.15692  | up         |
| <i>mir-4816-3p</i> | I          | 6185122  | 6185144  | +      | 4.87381  | up         |
| <i>mir-49-3p</i>   | X          | 9989342  | 9989363  | +      | -2.56882 | down       |
| <i>mir-61-5p</i>   | V          | 11770111 | 11770132 | -      | -3.10609 | down       |
| <i>mir-62</i>      | X          | 12692644 | 12692665 | +      | 2.98290  | up         |
| <i>mir-67-3p</i>   | III        | 5931364  | 5931387  | -      | 4.97758  | up         |
| <i>mir-784-5p</i>  | X          | 8074975  | 8074996  | -      | -3.58725 | down       |
| <i>mir-792-3p</i>  | V          | 3042105  | 3042127  | -      | 2.99367  | up         |
| <i>mir-79-3p</i>   | I          | 9333006  | 9333027  | +      | 2.93680  | up         |
| <i>mir-797-5p</i>  | X          | 4757123  | 4757147  | +      | 4.84776  | up         |
| <i>mir-799</i>     | X          | 8600657  | 8600678  | -      | 4.87381  | up         |
| <i>mir-83-3p</i>   | IV         | 7841691  | 7841712  | +      | -2.71474 | down       |

**Table S6.** Gene ontology (GO) terms with gene counts more than 20 based on predicted targets of down-regulated miRNA induced by coal combustion related PM<sub>2.5</sub>

| NO | GO ID      | GO Term                             | Count |
|----|------------|-------------------------------------|-------|
| 1  | GO:0040011 | locomotion                          | 478   |
| 2  | GO:0009792 | embryonic development               | 381   |
| 3  | GO:0002119 | larval development                  | 361   |
| 4  | GO:0040010 | positive regulation of growth rate  | 355   |
| 5  | GO:0000003 | reproduction                        | 276   |
| 6  | GO:0040007 | growth                              | 235   |
| 7  | GO:0010171 | body morphogenesis                  | 183   |
| 8  | GO:0018991 | oviposition                         | 129   |
| 9  | GO:0040017 | positive regulation of locomotion   | 126   |
| 10 | GO:0040035 | hermaphrodite genitalia development | 118   |
| 11 | GO:0040018 | positive regulation of body size    | 109   |
| 12 | GO:0018996 | molting cycle                       | 107   |
| 13 | GO:0006468 | protein amino acid phosphorylation  | 96    |
| 14 | GO:0007165 | signal transduction                 | 93    |
| 15 | GO:0002009 | morphogenesis of an epithelium      | 83    |
| 16 | GO:0008152 | metabolism                          | 80    |
| 17 | GO:0008340 | determination of adult life span    | 75    |
| 18 | GO:0006810 | transport                           | 71    |
| 19 | GO:0006508 | proteolysis                         | 57    |
| 20 | GO:0007242 | intracellular signaling cascade     | 55    |
| 21 | GO:0006811 | ion transport                       | 55    |
| 22 | GO:0043051 | regulation of pharyngeal pumping    | 54    |
| 23 | GO:0009790 | embryonic development               | 53    |
| 24 | GO:0006952 | defense response                    | 52    |
| 25 | GO:0006886 | intracellular protein transport     | 48    |
| 26 | GO:0040002 | cuticle biosynthesis                | 47    |

|    |            |                                                      |    |
|----|------------|------------------------------------------------------|----|
| 27 | GO:0045449 | regulation of transcription                          | 46 |
| 28 | GO:0007264 | small GTPase mediated signal transduction            | 45 |
| 29 | GO:0016477 | cell migration                                       | 39 |
| 30 | GO:0007155 | cell adhesion                                        | 37 |
| 31 | GO:0006412 | protein biosynthesis                                 | 34 |
| 32 | GO:0046662 | regulation of oviposition                            | 30 |
| 33 | GO:0015031 | protein transport                                    | 30 |
| 34 | GO:0048489 | synaptic vesicle transport                           | 26 |
| 35 | GO:0016311 | dephosphorylation                                    | 26 |
| 36 | GO:0005975 | carbohydrate metabolism                              | 26 |
| 37 | GO:0006470 | protein amino acid dephosphorylation                 | 24 |
| 38 | GO:0044262 | cellular carbohydrate metabolism                     | 24 |
| 39 | GO:0007186 | G-protein coupled receptor protein signaling pathway | 24 |
| 40 | GO:0048488 | synaptic vesicle endocytosis                         | 23 |
| 41 | GO:0007517 | muscle development                                   | 23 |
| 42 | GO:0040012 | regulation of locomotion                             | 23 |
| 43 | GO:0007617 | mating behavior                                      | 22 |
| 44 | GO:0006937 | regulation of muscle contraction                     | 22 |
| 45 | GO:0040015 | negative regulation of body size                     | 22 |
| 46 | GO:0040024 | dauer larval development                             | 20 |
| 47 | GO:0006813 | potassium ion transport                              | 20 |



**Table S7.** Gene ontology (GO) terms with gene counts more than 20 based on predicted targets of up-regulated miRNA induced by coal combustion related PM<sub>2.5</sub>

| NO | GO ID      | GO Term                                              | Count |
|----|------------|------------------------------------------------------|-------|
| 1  | GO:0009792 | embryonic development                                | 691   |
| 2  | GO:0002119 | larval development                                   | 585   |
| 3  | GO:0040010 | positive regulation of growth rate                   | 561   |
| 4  | GO:0040011 | locomotion                                           | 540   |
| 5  | GO:0000003 | reproduction                                         | 432   |
| 6  | GO:0040007 | growth                                               | 406   |
| 7  | GO:0040035 | hermaphrodite genitalia development                  | 247   |
| 8  | GO:0010171 | body morphogenesis                                   | 226   |
| 9  | GO:0006468 | protein amino acid phosphorylation                   | 188   |
| 10 | GO:0018991 | oviposition                                          | 171   |
| 11 | GO:0002009 | morphogenesis of an epithelium                       | 166   |
| 12 | GO:0040018 | positive regulation of body size                     | 153   |
| 13 | GO:0006810 | transport                                            | 133   |
| 14 | GO:0007165 | signal transduction                                  | 117   |
| 15 | GO:0018996 | molting cycle                                        | 109   |
| 16 | GO:0008152 | metabolism                                           | 103   |
| 17 | GO:0040017 | positive regulation of locomotion                    | 90    |
| 18 | GO:0009790 | embryonic development                                | 85    |
| 19 | GO:0006952 | defense response                                     | 70    |
| 20 | GO:0008340 | determination of adult life span                     | 66    |
| 21 | GO:0016477 | cell migration                                       | 65    |
| 22 | GO:0006508 | proteolysis                                          | 65    |
| 23 | GO:0007242 | intracellular signaling cascade                      | 63    |
| 24 | GO:0045449 | regulation of transcription                          | 49    |
| 25 | GO:0007186 | G-protein coupled receptor protein signaling pathway | 43    |
| 26 | GO:0008406 | gonad development                                    | 42    |

|    |            |                                                         |    |
|----|------------|---------------------------------------------------------|----|
| 27 | GO:0005975 | carbohydrate metabolism                                 | 42 |
| 28 | GO:0040025 | vulval development                                      | 39 |
| 29 | GO:0006811 | ion transport                                           | 38 |
| 30 | GO:0040024 | dauer larval development                                | 37 |
| 31 | GO:0007264 | small GTPase mediated signal transduction               | 35 |
| 32 | GO:0006412 | protein biosynthesis                                    | 35 |
| 33 | GO:0007638 | mechanosensory behavior                                 | 34 |
| 34 | GO:0006470 | protein amino acid dephosphorylation                    | 34 |
| 35 | GO:0006813 | potassium ion transport                                 | 32 |
| 36 | GO:0051056 | regulation of small GTPase mediated signal transduction | 32 |
| 37 | GO:0040027 | negative regulation of vulval development               | 31 |
| 38 | GO:0016311 | dephosphorylation                                       | 31 |
| 39 | GO:0007052 | mitotic spindle organization and biogenesis             | 29 |
| 40 | GO:0015031 | protein transport                                       | 29 |
| 41 | GO:0009612 | response to mechanical stimulus                         | 28 |
| 42 | GO:0045132 | meiotic chromosome segregation                          | 28 |
| 43 | GO:0000910 | cytokinesis                                             | 28 |
| 44 | GO:0030421 | defecation                                              | 26 |
| 45 | GO:0040026 | positive regulation of vulval development               | 26 |
| 46 | GO:0048477 | oogenesis                                               | 26 |
| 47 | GO:0006886 | intracellular protein transport                         | 26 |
| 48 | GO:0040015 | negative regulation of body size                        | 25 |
| 49 | GO:0044262 | cellular carbohydrate metabolism                        | 24 |
| 50 | GO:0006812 | cation transport                                        | 24 |
| 51 | GO:0045138 | tail tip morphogenesis                                  | 21 |
| 52 | GO:0009952 | anterior/posterior pattern formation                    | 20 |
| 53 | GO:0006816 | calcium ion transport                                   | 20 |
| 54 | GO:0043062 | extracellular structure organization and biogenesis     | 20 |
| 55 | GO:0035046 | pronuclear migration                                    | 20 |



**Table S8.** Signaling pathways with gene counts more than 4 based on predicted targets of up-regulated miRNAs in coal combustion related PM<sub>2.5</sub> exposed nematodes (Gene counts > 4)

| No. | pathway                                                           | gene count |
|-----|-------------------------------------------------------------------|------------|
| 1   | Oxidative stress response                                         | 4          |
| 2   | Oxytocin receptor mediated signaling pathway                      | 7          |
| 3   | Hedgehog signaling pathway                                        | 4          |
| 4   | Beta2 adrenergic receptor signaling pathway                       | 4          |
| 5   | EGF receptor signaling pathway                                    | 12         |
| 6   | TGF-beta signaling pathway                                        | 4          |
| 7   | Muscarinic acetylcholine receptor 2 and 4 signaling pathway       | 7          |
| 8   | Endothelin signaling pathway                                      | 12         |
| 9   | Adrenaline and noradrenaline biosynthesis                         | 5          |
| 10  | Wnt signaling pathway                                             | 16         |
| 11  | Metabotropic glutamate receptor group II pathway                  | 5          |
| 12  | Notch signaling pathway                                           | 6          |
| 13  | FGF signaling pathway                                             | 13         |
| 14  | Beta1 adrenergic receptor signaling pathway                       | 4          |
| 15  | Parkinson disease                                                 | 5          |
| 16  | Muscarinic acetylcholine receptor 1 and 3 SP                      | 7          |
| 17  | Apoptosis signaling pathway                                       | 7          |
| 18  | Alzheimer disease-presenilin pathway                              | 6          |
| 19  | Metabotropic glutamate receptor group III pathway                 | 7          |
| 20  | Integrin signaling pathway                                        | 11         |
| 21  | Histamine H1 receptor mediated signaling pathway                  | 5          |
| 22  | Inflammation mediated by chemokine and cytokine signaling pathway | 13         |
| 23  | VEGF signaling pathway                                            | 6          |
| 24  | Cadherin signaling pathway                                        | 6          |
| 25  | Nicotinic acetylcholine receptor signaling pathway                | 14         |
| 26  | PI3 kinase pathway                                                | 4          |

---

|    |                                                          |    |
|----|----------------------------------------------------------|----|
| 27 | Ubiquitin proteasome pathway                             | 6  |
| 28 | PDGF signaling pathway                                   | 10 |
| 29 | Ionotropic glutamate receptor pathway                    | 6  |
| 30 | Thyrotropin-releasing hormone receptor signaling pathway | 6  |
| 31 | Alzheimer disease-amyloid secretase pathway              | 9  |

---

**Table S9.** Signaling pathways with gene counts more than 4 based on predicted targets of based on down-regulated miRNAs in coal combustion related PM<sub>2.5</sub> exposed nematodes

| No. | pathway                                                           | gene count |
|-----|-------------------------------------------------------------------|------------|
| 1   | Oxytocin receptor mediated signaling pathway                      | 6          |
| 2   | Beta2 adrenergic receptor signaling pathway                       | 4          |
| 3   | EGF receptor signaling pathway                                    | 4          |
| 4   | Muscarinic acetylcholine receptor 2 and 4 signaling pathway       | 9          |
| 5   | Endothelin signaling pathway                                      | 6          |
| 6   | Wnt signaling pathway                                             | 6          |
| 7   | Metabotropic glutamate receptor group II pathway                  | 7          |
| 8   | FGF signaling pathway                                             | 9          |
| 9   | Parkinson disease                                                 | 4          |
| 10  | Muscarinic acetylcholine receptor 1 and 3 signaling pathway       | 6          |
| 11  | Alzheimer disease-presenilin pathway                              | 5          |
| 12  | Metabotropic glutamate receptor group III pathway                 | 6          |
| 13  | Integrin signaling pathway                                        | 6          |
| 14  | Inflammation mediated by chemokine and cytokine signaling pathway | 5          |
| 15  | Cadherin signaling pathway                                        | 4          |
| 16  | Nicotinic acetylcholine receptor signaling pathway                | 12         |
| 17  | PI3 kinase pathway                                                | 4          |
| 18  | PDGF signaling pathway                                            | 5          |
| 19  | Thyrotropin-releasing hormone receptor signaling pathway          | 6          |
| 20  | Alzheimer disease-amyloid secretase pathway                       | 5          |
